# Supplementary material
Source: PubMed Central journal article supplement (PMC2442517)
Supplement: pp.107.115436_1.pdf [file pp.107.115436_1.pdf]

## Supplementary Figure 1

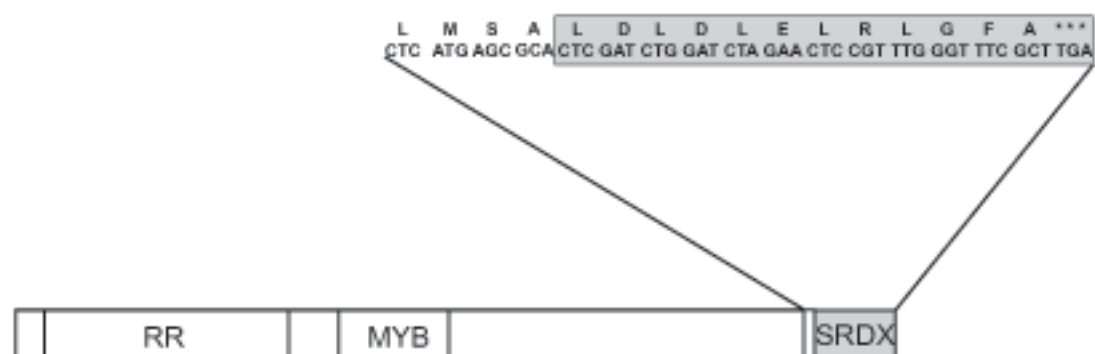

**Supplemental Figure S1.** Schematic representation of the ARR1-SRDX fusion protein. This figure shows a scheme of the ARR1-SRDX fusion protein with the junction between ARR1 and the SRDX peptide highlighted in the excerpt. The length of the domains in the scheme is not corresponding to their actual size within the protein. (RR is response regulator domain; MYB is the DNA-binding domain, domains are not drawn to scale)
