# Supplementary material
Source: PubMed Central journal article supplement (PMC2442517)
Supplement: pp.107.115436_2.pdf [file pp.107.115436_2.pdf]

## Supplemental Figure S2

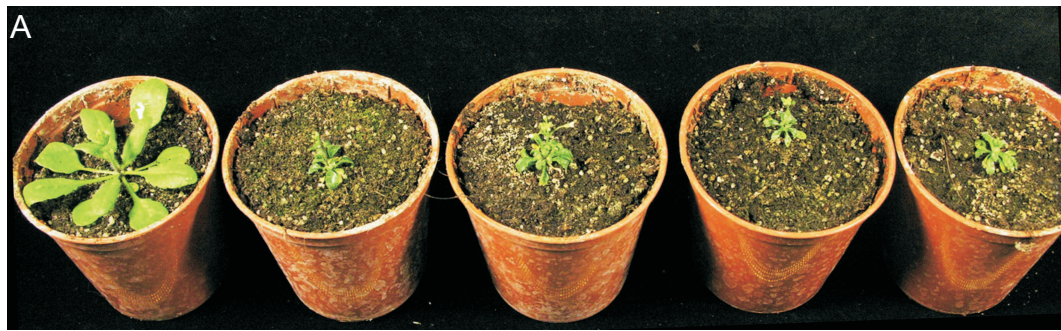

WT

ARR1-S-8

ARR1-S-10

ARR1-S-35

ARR1-S-23

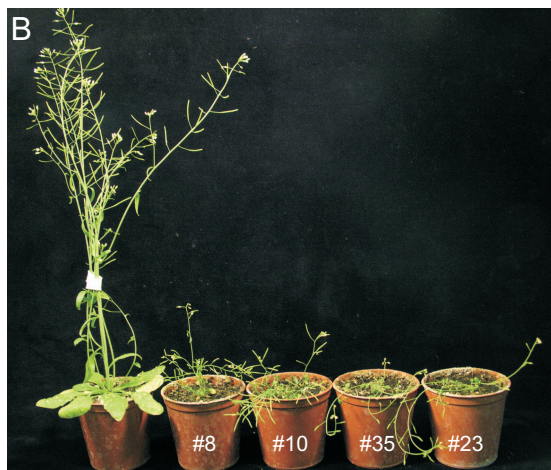

WT

35S:ARR1-SRDX transgenic lines

**Supplemental Figure S2.** Phenotype of different 35S:ARR1-SRDX lines. Four independent 35S:ARR1-SRDX transgenic lines are shown A, 20 DAG and B, 42 DAG. Wild-type plants (WT) of the same age are shown on the left side.
