# Supplementary material
Source: PubMed Central journal article supplement (PMC2442517)
Supplement: pp.107.115436_3.pdf [file pp.107.115436_3.pdf]

## Supplemental Figure S3

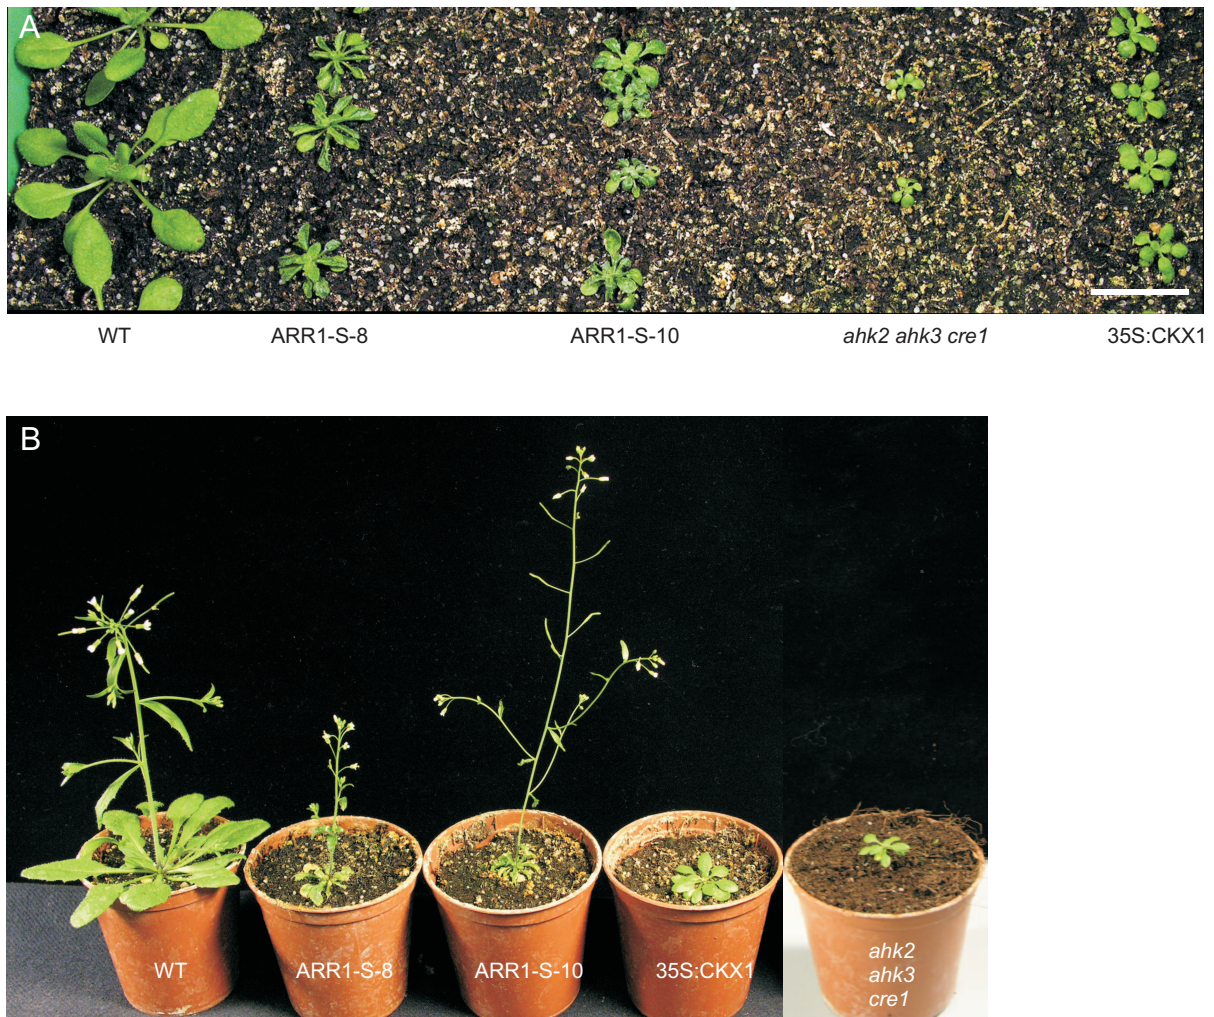

**Supplemental Figure S3.** Comparison of phenotypes of 35S:*ARR1-SRDX* plants with other cytokinin-related mutants. Wild type, the two 35S:*ARR1-SRDX*, 35S:*CKX1* and the *ahk2 ahk3 cre1* plants are grown on soil for A, 18 DAG and B, 28 DAG. Bar size in A is 3 cm.
