# Supplementary material
Source: PubMed Central journal article supplement (PMC2442517)
Supplement: pp.107.115436_4.pdf [file pp.107.115436_4.pdf]

**Supplementary table 2:** Comparison of microarray results presented in this study with the results published by Taniguchi *et al.* (2007).

The results of our microarray study were compared with the Northern blot results presented in Taniguchi *et al.* (2007; Table 1). For genes with more than one target on the microarray the results for each target are listed separately. Genes for which no results could be obtained in our study are grayed and the reason is indicated.

✓: positive result; (✓): positive by fold-change but insignificant p-value; ✗: negative result. A p-value of  $\leq 0.05$  was regarded as significant. Significant p-values are in bold face. The cytokinin effect indicates if a transcript was regulated by cytokinin, the genotype effect indicates if a transcript was influenced by the expression of the *ARR1:SRDX* gene, and the interaction effect indicates if the regulation by cytokinin of a transcript was influenced by the expression of the *ARR1:SRDX* gene. WT, wild type; GST, gene-specific tag.

| Gene product                                 | AGI ID    | CATMA ID     | Induction by cytokinin confirmed in WT | Lower expressed in ARR1-S-8 | Induction by cytokinin diminished and/or delayed in ARR1-S-8 | p-value of cytokinin effect | p-value of genotype effect | p-value of interaction effect | Number of spots above background |
|----------------------------------------------|-----------|--------------|----------------------------------------|-----------------------------|--------------------------------------------------------------|-----------------------------|----------------------------|-------------------------------|----------------------------------|
| ARR3                                         | At1g59940 | CATMA1a48985 | ✓                                      | ✗                           | ✗                                                            | <b>6.19E-10</b>             | 7.05E-02                   | <b>1.17E-02</b>               | 23                               |
| ARR4                                         | At1g10470 | CATMA1a09322 | ✓                                      | ✓                           | ✓                                                            | <b>7.81E-13</b>             | <b>1.77E-04</b>            | <b>3.59E-02</b>               | 60                               |
| ARR5                                         | At3g48100 | CATMA3a41123 | not detected                           |                             |                                                              |                             |                            |                               | 0                                |
| ARR6                                         | At5g62920 | CATMA5a58475 | ✓                                      | ✓                           | ✓                                                            | <b>1.54E-19</b>             | <b>1.67E-06</b>            | <b>3.33E-02</b>               | 11                               |
| ARR7                                         | At1g19050 | CATMA1a18090 | ✓                                      | ✓                           | ✓                                                            | <b>8.43E-12</b>             | <b>2.20E-08</b>            | <b>4.77E-02</b>               | 38                               |
| ARR8                                         | At2g41310 | CATMA2a39655 | ✓                                      | ✓                           | (✓)                                                          | <b>3.82E-07</b>             | <b>2.75E-02</b>            | 6.15E-01                      | 26                               |
| ARR9                                         | At3g57040 | CATMA3a50023 | ✓                                      | ✗                           | (✓)                                                          | <b>3.02E-03</b>             | <b>2.27E-05</b>            | 3.74E-01                      | 34                               |
| ARR15                                        | At1g74890 | CATMA1c72157 | not on array                           |                             |                                                              |                             |                            |                               |                                  |
| ARR16                                        | At2g40670 | CATMA2a38980 | ✓                                      | ✓                           | ✓                                                            | <b>8.74E-17</b>             | <b>5.52E-15</b>            | <b>1.50E-04</b>               | 18                               |
| ARR17                                        | At3g56380 | CATMA3c57821 | not on array                           |                             |                                                              |                             |                            |                               |                                  |
| Cytokinin oxidase (CKX4)                     | At4g29740 | CATMA4a31370 | ✓                                      | ✓                           | ✓                                                            | <b>9.98E-17</b>             | <b>7.98E-11</b>            | <b>1.38E-08</b>               | 29                               |
| Cytokinin hydroxylase (CYP735A2)             | At1g67110 | CATMA1a56420 | not detected                           |                             |                                                              |                             |                            |                               | 3                                |
| Putative disease resistance response protein | At4g11190 |              | no CATMA GST                           |                             |                                                              |                             |                            |                               |                                  |
| Putative glutaredoxin                        | At2g30540 | CATMA2c47507 | not on array                           |                             |                                                              |                             |                            |                               |                                  |
| Expansin (EXP1)                              | At1g69530 | CATMA1a58850 | ✓                                      | ✗                           | ✓                                                            | <b>5.98E-08</b>             | <b>1.11E-10</b>            | <b>1.86E-02</b>               | 60                               |
| Putative glutathione S-transferase           | At2g29490 | CATMA2c47489 | not on array                           |                             |                                                              |                             |                            |                               |                                  |
| Nodulin-like protein (NIP1;1) (NLM1)         | At4g19030 | CATMA4a20180 | not detected                           |                             |                                                              |                             |                            |                               | 0                                |
|                                              |           | CATMA4c42390 | not on array                           |                             |                                                              |                             |                            |                               |                                  |
| Putative disease resistance response protein | At4g11210 |              | no CATMA GST                           |                             |                                                              |                             |                            |                               |                                  |
| Putative transferase-family protein          | At2g40230 | CATMA2a38490 | ✓                                      | ✓                           | ✓                                                            | <b>8.39E-06</b>             | <b>3.21E-16</b>            | <b>4.08E-02</b>               | 58                               |
| AUX/IAA family protein (IAA3) (SHY2)         | At1g04240 | CATMA1a03102 | not detected                           |                             |                                                              |                             |                            |                               | 0                                |
| Fascilin-like arabinogalactan protein (FLA6) | At2g20520 | CATMA2a19020 | not detected                           |                             |                                                              |                             |                            |                               | 1                                |
| Putative glutaredoxin                        | At3g62930 | CATMA3a56110 | ✓                                      | ✗                           | ✓                                                            | <b>3.09E-04</b>             | <b>1.45E-02</b>            | 4.05E-01                      | 58                               |
| RING finger protein                          | At1g76410 | CATMA1c72178 | not on array                           |                             |                                                              |                             |                            |                               |                                  |
