# Supplementary material
Source: PubMed Central journal article supplement (PMC2442517)
Supplement: pp.107.115436_5.pdf [file pp.107.115436_5.pdf]

**Supplementary table 3:** List of the primers used in this study.

|                                     | Sense primer                             | Antisense primer                           |
|-------------------------------------|------------------------------------------|--------------------------------------------|
| <i>SRDX</i> probe for Northern blot | ATGAGCGCACTCGATC                         | AGTTTGTACAAGAAAG                           |
| <i>ARR1</i> probe for Northern blot | GAACAATATCCCCGAGAG<br>CA                 | TCTGGTGGTGAACATGTCGT                       |
| <i>ARR5</i> probe for Northern blot | GGAAGTTCATCGAGCGGT<br>T                  | ATCCAGTCATCCCAGGCATA                       |
| <i>ARR7</i> probe for Northern blot | GAGGAATGAAGCTGAGGA<br>ATGC               | CATTCGTTTTGAACATGAAGA<br>GTCC              |
| <i>ARR6</i> promoter (1 kb)         | GCAAGCTTACAATCACAAC<br>AGCTCATGAACAAAATC | GCTCTAGAGAAACCATGGTGG<br>CAGTGGTTGGGC      |
| <i>ARR2</i> genomic clone           | CTTCTTCTCCTTCTCTGAT<br>CGTTCCG           | GTTTTAGAGTGCACTGTATTC<br>GAGT              |
| <i>ARR10</i> cDNA                   | CACCATGACTATGGAGCAA<br>GAAATTG           | TCAAGCTGACAAAGAAAAGGG                      |
| <i>ARR12</i> cDNA                   | AAAAAGCAGGCTTCATGAC<br>TGTTGAACAAAATTT   | AGAAAGCTGGGTCTGTACAC<br>CTGCTTCATCGT       |
| <i>ARR19</i> cDNA                   | AAAAAGCAGGCTTCATGTT<br>GGTGGGAAAGATAA    | AGAAAGCTGGGTCAAGTCAAGT<br>CAAGATCTGTCCG    |
| <i>ARR21</i> cDNA                   | AAAAAGCAGGCTTCATGGC<br>TTCTGCTCAATCTTTCT | AGAAAGCTGGGTCTCAATTGT<br>GACCAATCTGATCGAAA |
| <i>SRDX</i> amplification           | ATGAGCGCACTCGATC                         | AGTTTGTACAAGAAAG                           |
